# Supplementary material for: Is Infantile Hemangioma a Neuroendocrine Tumor?
Source: MDPI journal article supplement (doi:10.3390/ijms23095140), 2022-05-05
Supplement: s1 [file s1]

## Supplementary Information for

# Is Infantile Hemangioma a Neuroendocrine Tumor?

**Priscilla Kaulanjan-Checkmodine**<sup>1,†</sup>, **Sandra Oucherif**<sup>1,†</sup>, **Sorilla Prey**<sup>1,2</sup>,  
**Etienne Gontier**<sup>3</sup>, **Sabrina Lacomme**<sup>3</sup>, **Maya Loot**<sup>4</sup>, **Marijana Miljkovic-**  
**Licina**<sup>5</sup>, **Muriel Cario**<sup>1,6</sup>, **Christine Léauté-Labrèze**<sup>1,2,6</sup>, **Alain Taieb**<sup>1,2,6</sup>,  
**François Moisan**<sup>1,\*†</sup> and **Hamid Reza Rezvani**<sup>1,6,\*†</sup>

1 BRIC, UMR 1312, Inserm, University Bordeaux, F-33076 Bordeaux, France;  
priscilla.kaulanjan@gmail.com (P.K.-C.); ouch\_sandra@hotmail.fr (S.O.); sorilla.prey@chu-  
bordeaux.fr (S.P.); muriel.cario-andre@u-bordeaux.fr (M.C.); christine.labreze@chu-  
bordeaux.fr (C.L.-L.); alain.taieb@u-bordeaux.fr (A.T.)

2 Service de Dermatologie Adulte et Pédiatrique, CHU de Bordeaux, F-33000 Bordeaux,  
France

3 Electron Microscopy Unit, Bordeaux Imaging Center, F-33076 Bordeaux, France;  
etienne.gontier@u-bordeaux.fr (E.G.); sabrina.lacomme@u-bordeaux.fr (S.L.)

4 CHU de Bordeaux, Service de Chirurgie Pédiatrique, F-33000 Bordeaux, France;  
maya.loot@chu-bordeaux.fr

5 Department of Pathology and Immunology, University of Geneva Medical School, Rue  
Michel-Servet 1, CH-1211 Geneva, Switzerland; marijana.licina@unige.ch

6 Centre de Référence pour les Maladies Rares de la Peau, CHU de Bordeaux, INSERM  
U1312, F-33000 Bordeaux, France

\* Correspondence: francois.moisan@u-bordeaux.fr (F.M.); hamid-reza.rezvani@u-  
bordeaux.fr (H.R.R.)

† These authors contributed equally to this work.

### \* Corresponding Authors and lead contacts

Postal address: INSERM U1035, Bordeaux, F-33000 France

Email address: [francois.moisan@u-bordeaux.fr](mailto:francois.moisan@u-bordeaux.fr), [hamid-reza.rezvani@u-bordeaux.fr](mailto:hamid-reza.rezvani@u-bordeaux.fr)

Phone: +33-557-575-683 Fax: +33-557-571-374

Supplemental figures

A

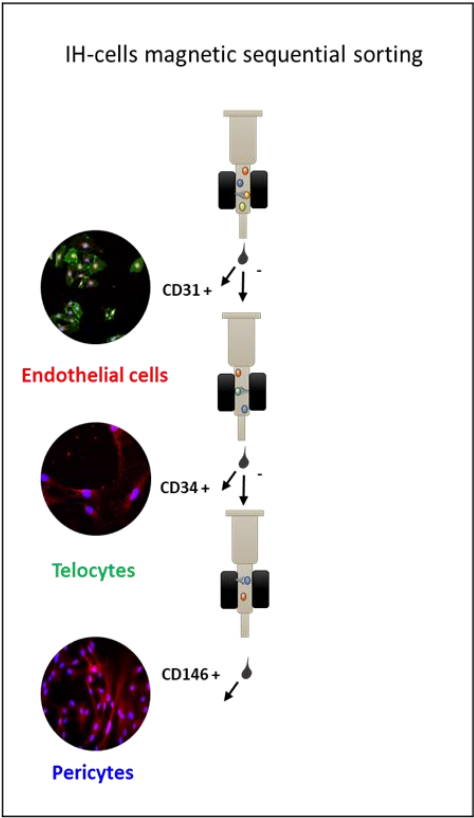

C

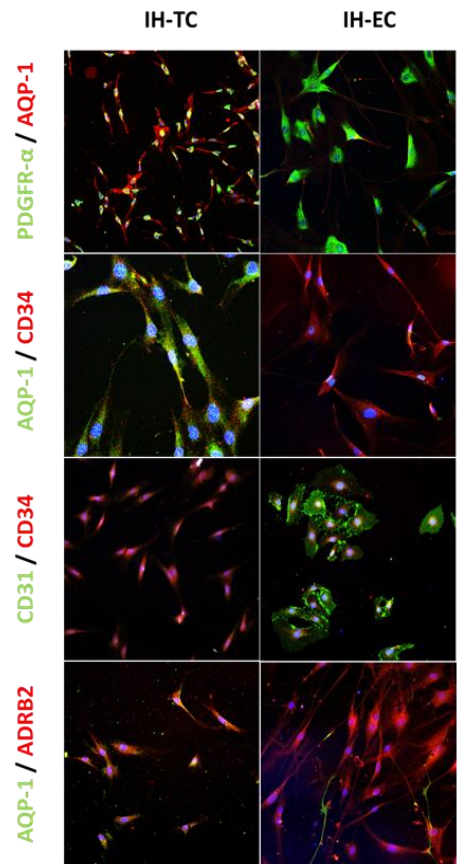

B

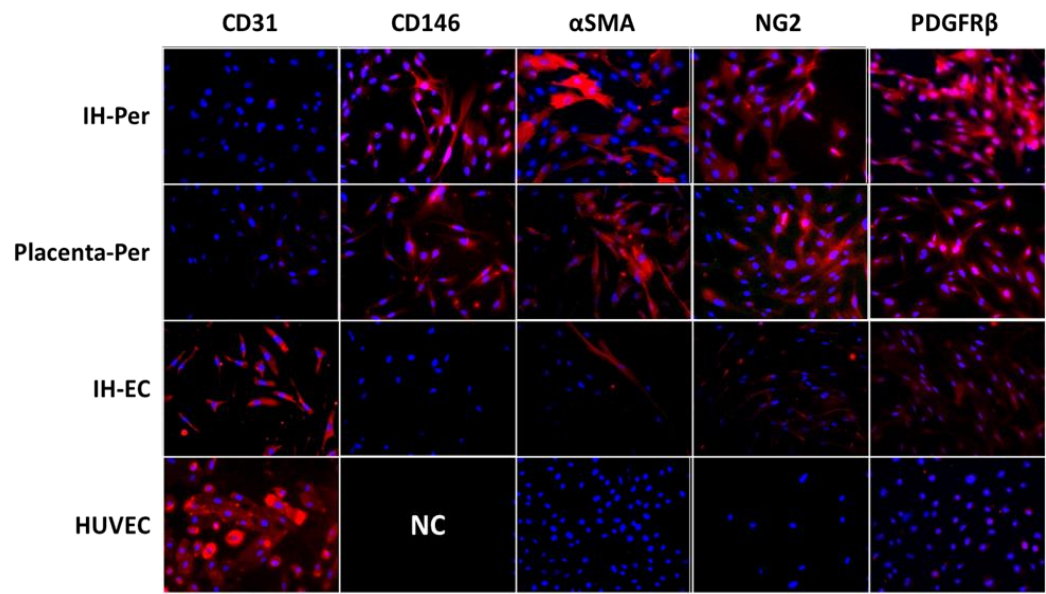

**Figure S1. Isolation and characterization of EC, PER and TC from IH fresh tissue.** (A) EC, TC and PER were sequentially isolated from digested IH tissue using respectively anti-CD31, anti-CD34 and anti-CD146 magnetic microbeads. (B) Immunocytofluorescent staining were used to verify the purity of isolated cells. IH-PER highly express CD146,  $\alpha$ SMA, NG2 and PDGFR $\beta$ . IH-EC highly express CD34 marker. Placenta pericytes and human umbilical vein endothelial cells (HUVEC) are control cells. Nuclei are in blue with DAPI. Scale bar size is 50  $\mu$ m. (C) Immunocytofluorescent staining were used for characterization of telocytes isolated from fresh IH tissue. IH-TC are CD31- PDGFR-CD34+ AQP1+ cells while EC are CD31+ PDGFR+CD34+ AQP1- cells.

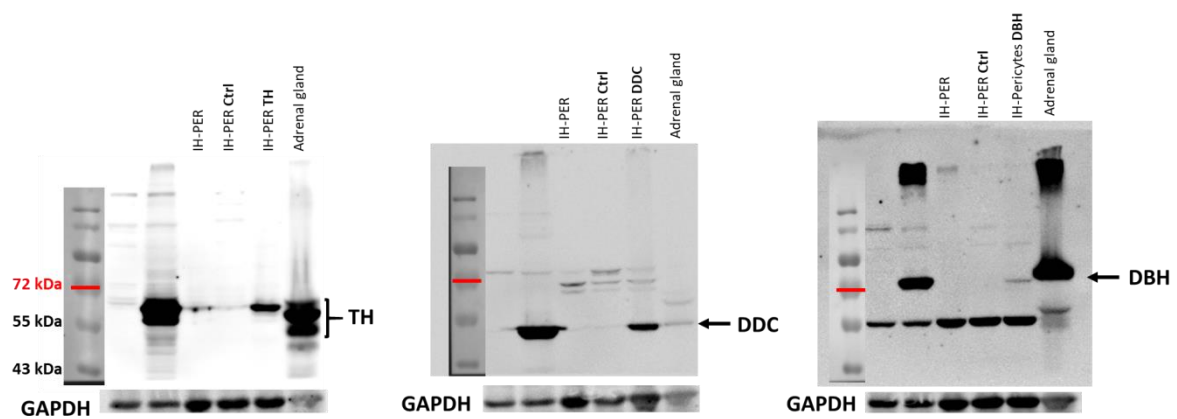

**Figure S2: Western-blotting the first three enzymes of catecholamines biosynthesis pathway TH, DDC and DBH.** To correctly verifying our antibodies, IH-PER were transfected with expression plasmids encoding human TH (58kDa), DDC (53 kDa) or DBH (70kDa). Protein extracts from transfected and non-transfected cells were subjected to western blotting. Adrenal gland (AG) is used as positive control. GAPDH is used as loading control. Used exposure times do not always permit identification of the endogenous protein.

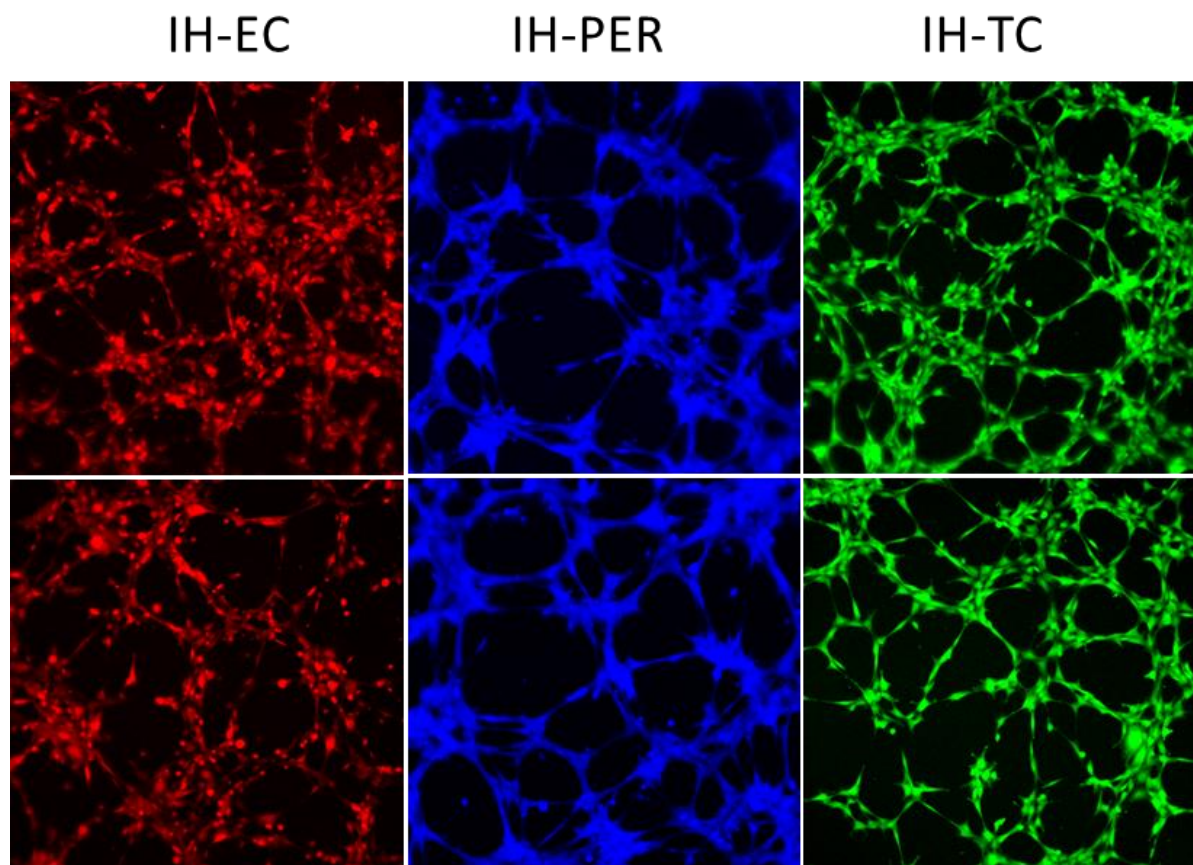

**Figure S3: IH-EC, -PER and -TC are capable to form capillary-like tube when seeded into Matrigel-coated wells.** IH-EC (red), IH-PER (blue) and IH-TC (green) isolated from fresh IH form tubes 3 hours after seeding in Matrigel-coated wells containing EGM2 medium.

## Supplementary Tables

**Table S1. List of patients included in the study**

| Number | Age (months) | Gender | Localization         | Treatment   |
|--------|--------------|--------|----------------------|-------------|
| 1      | 4            | F      | Neck                 | -           |
| 2      | 4            | F      | Ass                  | -           |
| 3      | 6            | M      | Retro-auricular      | -           |
| 4      | 7            | M      | Left flank           | -           |
| 5      | 7            | F      | Back                 | -           |
| 6      | 8            | F      | Torso                | -           |
| 7      | 11           | F      | Axillary             | -           |
| 8      | 12           | M      | Tempe                | -           |
| 9      | 13           | F      | Pelvis               | -           |
| 10     | 13           | M      | Postauricular        | -           |
| 11     | 19           | F      | Temple and chin      | -           |
| 12     | 21           | F      | Back                 | -           |
| 13     | 23           | M      | Cheek                | -           |
| 14     | 25           | F      | Lips                 | -           |
| 15     | 27           | M      | Abdomen and elbow    | -           |
| 16     | 28           | M      | Forehead             | -           |
| 17     | 32           | F      | Arm                  | -           |
| 18     | 32           | F      | NA                   | -           |
| 19     | 33           | F      | Shoulder             | -           |
| 20     | 36           | F      | Forehead             | -           |
| 21     | 38           | F      | Cheek                | -           |
| 22     | 41           | M      | Left neck            | -           |
| 23     | 43           | M      | Scalp                | -           |
| 24     | 45           | F      | Back                 | -           |
| 25     | 55           | F      | Hand                 | -           |
| 26     | 57           | F      | Thorax               | -           |
| 27     | 60           | F      | Right flank          | -           |
| 28     | 69           | F      | Right upper lip      | -           |
| 29     | 69           | M      | Back                 | -           |
| 30     | 72           | F      | Forehead             | -           |
| 31     | 75           | F      | Thorax               | -           |
| 32     | 83           | M      | Torso                | -           |
| 33     | 94           | M      | Torso                | -           |
| 34     | 110          | F      | Thorax               | -           |
| 35     | 123          | F      | Neck                 | -           |
| 36     | 131          | F      | Torso                | -           |
| 37     | 4            | F      | Cervical anterior    | Propranolol |
| 38     | 6            | F      | Scapular             | Propranolol |
| 39     | 7            | M      | Iliac crest          | Propranolol |
| 40     | 9            | F      | Lumbar               | Propranolol |
| 41     | 12           | M      | Hemangiomatosis      | Propranolol |
| 42     | 18           | M      | Left arm             | Propranolol |
| 43     | 23           | M      | Upper lips           | Propranolol |
| 44     | 25           | F      | Shoulder             | Propranolol |
| 45     | 26           | F      | Interbrow            | Propranolol |
| 46     | 27           | F      | Forehead             | Propranolol |
| 47     | 30           | F      | Forearm              | Propranolol |
| 48     | 33           | F      | Periorbital Temporal | Propranolol |
| 49     | 33           | F      | Axillary             | Propranolol |
| 50     | 33           | F      | Eyebrow              | Propranolol |
| 51     | 43           | M      | Forehead             | Propranolol |
| 52     | 59           | F      | Eyebrow              | Propranolol |
| 53     | 80           | M      | Lips                 | Propranolol |
| 54     | 110          | F      | Back                 | Propranolol |

**Table S2. Primary antibodies used for immunohistochemistry and western blot**

| <b>Antibody</b> | <b>Reference</b> | <b>Provider</b> | <b>Concentration</b> | <b>Incubation</b> | <b>Experimentation</b> |
|-----------------|------------------|-----------------|----------------------|-------------------|------------------------|
| Glut-1          | PA1-21041        | Thermofisher    | 1/200                | Overnight 4°C     | HIC                    |
| Ki67            | NCL-L-Ki67-MM1   | Leica           | 1/200                | Overnight 4°C     | HIC                    |
| DAPI            | D9542            | Sigma-Aldrich   | 1/10 000             | 15 minutes RT     | HIC                    |
| TH              | SAB4502964       | Sigma-Aldrich   | 1/200*-1/1 000**     | Overnight 4°C     | HIC*, WB**             |
| DDC             | HPA017742        | Sigma-Aldrich   | 1/200*-1/500*        | Overnight 4°C     | HIC*, WB**             |
| DBH             | PA5-34664        | Thermofisher    | 1/200*-1/5 000*      | Overnight 4°C     | HIC*, WB**             |
| PNMT            | ab119784         | Abcam           | 1/50*-1/500**        | Overnight 4°C     | HIC*, WB**             |
| CD34            | MA1-10202        | Thermofisher    | 1/200                | Overnight 4°C     | HIC                    |
| $\alpha$ -SMA   | ab7817           | Abcam           | 1/500                | Overnight 4°C     | HIC                    |
| $\beta$ -actin  | A2228            | Sigma-Aldrich   | 1/10 000             | Overnight 4°C     | WB                     |
| GAPDH           | #2118S           | Cell signaling  | 1/10 000             | Overnight 4°C     | WB                     |
| CD31            | M0823            | Dako            | 1/20                 | Overnight 4°C     | HCC                    |
| CD146           | #2505-1          | Epitomics       | 1/250                | Overnight 4°C     | HCC                    |
| NG2             | MAB2585          | R&D systems     | 1/20                 | Overnight 4°C     | HCC                    |
| PDGFR $\beta$   | sc-339           | Santa Cruz      | 1/50                 | Overnight 4°C     | HCC                    |
| AQP1            | sc-25287         | Santa cruz      | 1/50                 | Overnight 4°C     | HCC                    |
| AQP1            | AB2219           | Merk            | 1/1000               | Overnight 4°C     | HIC                    |
| Chromogranine A | M0869            | Dako            | 1/100                | Overnight 4°C     | HIC                    |

RT: Room Temperature, Concentration: \* = HIC, \*\* = WB
